# Supplementary material for: Enhanced Ionic Polymer–Metal Composites with Nanocomposite Electrodes for Restoring Eyelid Movement of Patients with Ptosis
Source: MDPI journal article supplement (doi:10.3390/nano13030473), 2023-01-24
Supplement: s1 [file s1]

# Enhanced Ionic Polymer–Metal Composites with Nanocomposite Electrodes for Restoring Eyelid Movement of Patients with Ptosis

Sara Sadat Hosseini <sup>1</sup>, Bakhtiar Yamini <sup>1</sup>, Levan Ichkitidze <sup>2,3</sup>, Majid Asadi <sup>4</sup>, Julie Fernandez <sup>1</sup> and Seifollah Gholampour <sup>1,\*</sup>

<sup>1</sup> Department of Neurological Surgery, University of Chicago, Chicago, IL 60637, USA

<sup>2</sup> Institute of Biomedical Systems of National Research University of Electronic Technology (MIET), 124498 Moscow, Russia

<sup>3</sup> Institute of Bionic Technologies and Engineering of I.M. Sechenov First Moscow State Medical University, 119991 Moscow, Russia

<sup>4</sup> Northern Michigan University, Marquette, MI 49855, USA

\* Correspondence: seifgholampour@bsd.uchicago.edu

## Effect of rolled graphene layers on the BSA-CNT electrode:

The electrical properties of the BSA-CNT electrode include electric field norm (V/m), current density norm (A/m<sup>2</sup>), and electrical conductivity (S/m) are listed in Table S1 based on the weight percentage and number of CNT in two rolled graphene layers condition: multi-wall CNT (MWCNT) and single-wall CNT (SWCNT). The optimal electrical conductivity of 3.28E-04 is obtained for BSA-SWCNT and BSA-MWCNT in weight percentages of 0.02% and 0.15%, respectively (Figs. S1, S2). In these optimal percentages, the differences in calculated main results (displacements, stress, and cation concentration) between BSA-MWCNT and BSA-SWCNT were not considerable and we did not report them.

| CNT wt%   | CNT Number | BSA-MWCNT                 |                                          |                               |
|-----------|------------|---------------------------|------------------------------------------|-------------------------------|
|           |            | Electric field norm (V/m) | Current density norm (A/m <sup>2</sup> ) | Electrical conductivity (S/m) |
| 0         | 0          | 12000                     | 1.20E-10                                 | 1.00E-14                      |
| 0.013745  | 9          | 14128                     | 2.74E-02                                 | 1.94E-06                      |
| 0.030541  | 20         | 14425                     | 2.74E-02                                 | 1.90E-06                      |
| 0.12211   | 80         | 14815                     | 3.51E-02                                 | 2.37E-06                      |
| 0.15262   | 100        | 28408                     | 9.32E+00                                 | 3.28E-04                      |
| 0.24408   | 160        | 30528                     | 4.3179                                   | 1.41E-04                      |
| 0.27455   | 180        | 30021                     | 3.8112                                   | 1.27E-04                      |
| 0.28978   | 190        | 29286                     | 3.438                                    | 1.17E-04                      |
| BSA-SWCNT |            |                           |                                          |                               |

|           |     |       |          |          |
|-----------|-----|-------|----------|----------|
| 0         | 0   | 12000 | 1.20E-10 | 1.00E-14 |
| 0.0019636 | 9   | 14128 | 2.74E-02 | 1.94E-06 |
| 0.0043636 | 20  | 14425 | 2.74E-02 | 1.90E-06 |
| 0.017454  | 80  | 14815 | 3.51E-02 | 2.37E-06 |
| 0.021817  | 100 | 28408 | 9.32E+00 | 3.28E-04 |
| 0.034906  | 160 | 30528 | 4.3179   | 1.41E-04 |
| 0.039269  | 180 | 30021 | 3.8112   | 1.27E-04 |
| 0.04145   | 190 | 29286 | 3.438    | 1.17E-04 |

**Table S1.** The changes in electric field norm (V/m), current density norm (A/m<sup>2</sup>), and electrical conductivity (S/m) in BSA-CNT electrode with different rolled graphene layers.

BSA: bovine serum albumin, CNT: carbon nanotube, SWCNT: single-wall CNT, MWCNT: multi-wall CNT.

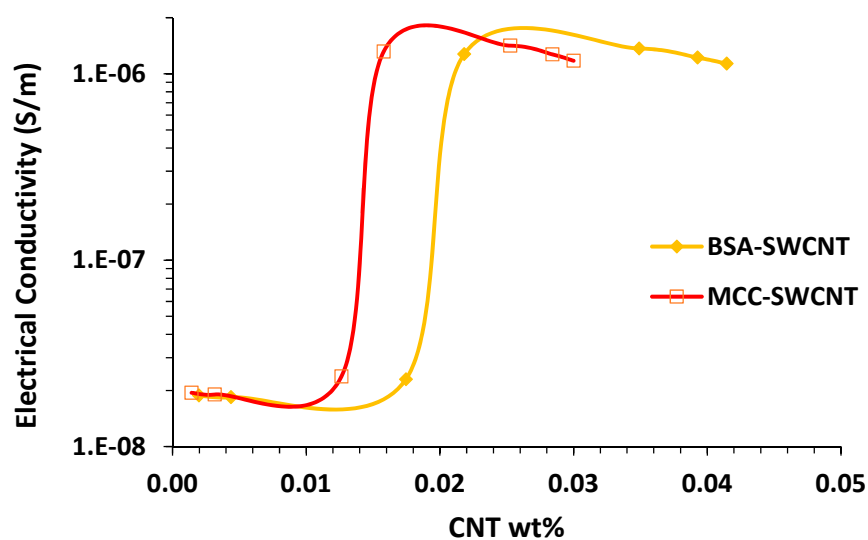

**Figure. S1.** Electrical conductivity in BSA-SWCNT and MCC-SWCNT (0.00-0.05 wt%).

MCC: microcrystalline cellulose, BSA: bovine serum albumin, CNT: carbon nanotube, SWCNT: single-wall CNT, MWCNT: multi-wall CNT.

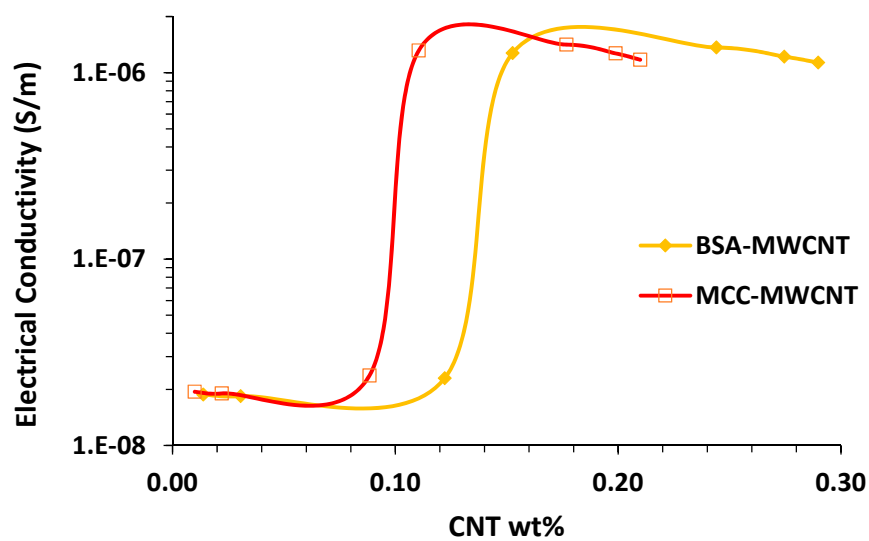

**Figure. S2.** Electrical conductivity in BSA-MWCNT and MCC-MWCNT (0.00-0.3 wt%). .  
MCC: microcrystalline cellulose, BSA: bovine serum albumin, CNT: carbon nanotube, SWCNT: single-wall CNT, MWCNT: multi-wall CNT.
